# Supplementary material for: Improvements in Cd stable isotope analysis achieved through use of liquid–liquid extraction to remove organic residues from Cd separates obtained by extraction chromatography
Source: Royal Society of Chemistry journal article supplement (doi:10.1039/c5ja00115c), 2015-08-07
Supplement: c5ja00115c1.pdf [file c5ja00115c1.pdf]

**Supplementary Information to:**

**Improvements in Cd stable isotope analysis achieved through use of liquid-liquid  
extraction to remove organic residues from Cd separates obtained by extraction  
chromatography**

Katy Murphy<sup>1\*</sup>, Mark Rehkämper<sup>1</sup>, Katharina Kreissig<sup>1</sup>, Barry Coles<sup>1</sup>, Tina van de Flierdt<sup>1</sup>

<sup>1</sup>Department of Earth Science and Engineering, Imperial College London,  
London SW7 2AZ, UK

\*Corresponding author. Email: k.murphy12@imperial.ac.uk. Tel. +44 2075947140

**S1** Complete Cd isotope data set for NIST 3108 Cd and Nod-A-1 samples. See main text for description of sample treatment methods. The reduction in sensitivity was not calculated for all samples, but it is appropriate to assume that the reduction was negligible unless stated.

| Sample | Type    | Mass Cd<br>(ng) | Treatment | $\epsilon^{114/110}\text{Cd}$ | 2SE (internal) | 2SD (external) | Number of<br>bracketing standards | Included in<br>Table 2? | Reduction in<br>sensitivity (%) | Comments                                   |
|--------|---------|-----------------|-----------|-------------------------------|----------------|----------------|-----------------------------------|-------------------------|---------------------------------|--------------------------------------------|
| 1      | NIST Cd | 60              | Untreated | -0.14                         | 1.35           | 0.83           | 3                                 | No                      |                                 |                                            |
| 2      | NIST Cd | 60              | Untreated | 0.49                          | 0.67           | 0.42           | 4                                 | Yes                     |                                 |                                            |
| 3      | NIST Cd | 60              | Untreated | 0.06                          | 0.77           | 0.65           | 5                                 | Yes                     |                                 |                                            |
| 4      | NIST Cd | 60              | Untreated | -0.44                         | 0.80           | 1.00           | 9                                 | Yes                     |                                 |                                            |
| 5      | NIST Cd | 60              | Untreated | 0.25                          | 0.84           | 0.43           | 5                                 | Yes                     |                                 |                                            |
| 6      | NIST Cd | 60              | Untreated | -0.55                         | 0.82           | 0.59           | 6                                 | Yes                     |                                 |                                            |
| 7      | NIST Cd | 60              | Untreated | -0.31                         | 0.58           | 0.62           | 34                                | Yes                     |                                 |                                            |
| 8      | NIST Cd | 30 + 30         | Refluxed  | 3.09                          | 0.85           | 0.65           | 68                                | No                      | 39                              |                                            |
| 9      | NIST Cd | 30              | Refluxed  | 3.48                          | 1.13           | 0.85           | 8                                 | No                      | 33                              |                                            |
| 10     | NIST Cd | 59              | Refluxed  | 1.41                          | 1.25           | 1.51           | 5                                 | No                      | 31                              |                                            |
| 11     | NIST Cd | 60              | Refluxed  | 0.95                          | 0.98           | 1.18           | 6                                 | No                      | 21                              |                                            |
| 12     | NIST Cd | 59              | Refluxed  | 7.23                          | 1.36           | 2.03           | 5                                 | No                      | 42                              |                                            |
| 13     | NIST Cd | 59              | Refluxed  | 4.00                          | 0.94           | 1.01           | 10                                | No                      | 28                              |                                            |
| 14     | NIST Cd | 60              | Refluxed  | 5.08                          | 0.87           | 0.62           | 11                                | Yes                     | 35                              |                                            |
| 15     | NIST Cd | 60              | Refluxed  | 6.64                          | 0.73           | 0.24           | 6                                 | Yes                     | 36                              |                                            |
| 16     | NIST Cd | 59              | Refluxed  | 3.79                          | 1.15           | 0.77           | 6                                 | Yes                     | 34                              | Internal precision not unusual for session |
| 17     | NIST Cd | 60              | Refluxed  | 2.73                          | 0.65           | 0.62           | 34                                | Yes                     | 36                              |                                            |
| 18     | NIST Cd | 79              | Refluxed  | 1.17                          | 0.98           | 0.78           | 6                                 | No                      | 19                              |                                            |
| 19     | NIST Cd | 98              | Refluxed  | 1.05                          | 0.98           | 0.67           | 6                                 | No                      | 17                              |                                            |
| 20     | NIST Cd | 118             | Refluxed  | 1.65                          | 0.70           | 0.94           | 8                                 | No                      | 10                              |                                            |

S1 continued

| Sample | Type    | Mass Cd<br>(ng) | Treatment                  | $\epsilon^{114/110}\text{Cd}$ | 2SE (internal) | 2SD (external) | No. bracketing<br>standards | Included in<br>Table 2? | Reduction in<br>sensitivity (%) | Comments                                                         |
|--------|---------|-----------------|----------------------------|-------------------------------|----------------|----------------|-----------------------------|-------------------------|---------------------------------|------------------------------------------------------------------|
| 21     | NIST Cd | 118             | Refluxed                   | 0.57                          | 1.00           | 0.75           | 8                           | No                      | 18                              |                                                                  |
| 22     | NIST Cd | 118             | Refluxed                   | 0.73                          | 1.18           | 0.59           | 6                           | No                      | 13                              |                                                                  |
| 23     | NIST Cd | 176             | Refluxed                   | -0.51                         | 0.84           | 0.66           | 7                           | No                      | 5                               |                                                                  |
| 24     | NIST Cd | 176             | Refluxed                   | 0.23                          | 0.83           | 0.63           | 6                           | No                      | -1                              |                                                                  |
| 25     | NIST Cd | 178             | Refluxed                   | 0.25                          | 0.90           | 0.45           | 8                           | No                      | 5                               |                                                                  |
| 26     | NIST Cd | 235             | Refluxed                   | 0.41                          | 0.89           | 0.59           | 9                           | No                      | -6                              |                                                                  |
| 27     | NIST Cd | 235             | Refluxed                   | 0.09                          | 1.18           | 0.87           | 6                           | No                      | 2                               |                                                                  |
| 28     | NIST Cd | 60              | Refluxed (overnight only)  | 3.85                          | 0.91           | 0.80           | 6                           | No                      |                                 |                                                                  |
| 29     | NIST Cd | 60              | Extracted (once)           | 0.44                          | 1.06           | 0.48           | 6                           | No                      |                                 |                                                                  |
| 30     | NIST Cd | 60              | Extracted                  | 1.12                          | 0.77           | 1.86           | 10                          | No                      |                                 | Run after several refluxed samples, instrument possibly unstable |
| 31     | NIST Cd | 60              | Extracted                  | -0.31                         | 1.10           | 0.69           | 6                           | No                      |                                 |                                                                  |
| 32     | NIST Cd | 60              | Extracted                  | -0.21                         | 1.17           | 0.54           | 7                           | Yes                     |                                 | Internal precision not unusual for session                       |
| 33     | NIST Cd | 60              | Extracted                  | 0.33                          | 0.95           | 0.51           | 8                           | Yes                     |                                 |                                                                  |
| 34     | NIST Cd | 60              | Extracted                  | -0.34                         | 0.88           | 0.74           | 8                           | Yes                     |                                 |                                                                  |
| 35     | NIST Cd | 60              | Extracted                  | -0.19                         | 0.46           | 0.62           | 34                          | Yes                     |                                 |                                                                  |
| 36     | NIST Cd | 60              | Extracted                  | 0.00                          | 0.69           | 0.62           | 34                          | Yes                     |                                 |                                                                  |
| 37     | NIST Cd | 60              | Extracted                  | 0.21                          | 0.42           | 0.62           | 7                           | Yes                     |                                 |                                                                  |
| 38     | NIST Cd | 60              | Extracted (once), refluxed | -0.19                         | 0.56           | 0.63           | 6                           | No                      |                                 |                                                                  |
| 39     | NIST Cd | 60              | Extracted and refluxed     | 0.07                          | 0.52           | 1.15           | 5                           | No                      |                                 |                                                                  |
| 40     | NIST Cd | 60              | Extracted and refluxed     | 0.07                          | 0.46           | 0.46           | 5                           | Yes                     |                                 |                                                                  |
| 41     | NIST Cd | 60              | Extracted and refluxed     | -0.51                         | 0.59           | 0.74           | 7                           | Yes                     |                                 |                                                                  |
| 42     | NIST Cd | 60              | Extracted and refluxed     | 0.14                          | 0.70           | 0.43           | 6                           | Yes                     |                                 |                                                                  |
| 43     | NIST Cd | 60              | Extracted and refluxed     | 0.19                          | 0.63           | 0.34           | 8                           | Yes                     |                                 |                                                                  |
| 44     | NIST Cd | 60              | Extracted and refluxed     | -0.14                         | 0.57           | 0.76           | 9                           | Yes                     |                                 |                                                                  |

S1 continued

| Sample | Type    | Mass Cd<br>(ng) | Treatment              | $\epsilon^{114/110}\text{Cd}$ | 2SE<br>(internal) | 2SD<br>(external) | Number of<br>bracketing standards | Included in<br>Table 2? | Reduction in<br>sensitivity (%) | Comments           |
|--------|---------|-----------------|------------------------|-------------------------------|-------------------|-------------------|-----------------------------------|-------------------------|---------------------------------|--------------------|
| 45     | NIST Cd | 60              | Extracted and refluxed | 0.22                          | 0.67              | 0.47              | 9                                 | Yes                     |                                 |                    |
| 46     | NIST Cd | 60              | Extracted and refluxed | -0.47                         | 0.53              | 0.81              | 6                                 | Yes                     |                                 |                    |
| 47     | NIST Cd | 60              | Extracted and refluxed | 0.48                          | 0.44              | 0.60              | 7                                 | Yes                     |                                 |                    |
| 48     | NIST Cd | 60              | Extracted and refluxed | 0.32                          | 0.57              | 0.67              | 7                                 | Yes                     |                                 |                    |
| 49     | NIST Cd | 60              | Refluxed and extracted | 2.69                          | 0.62              | 0.37              | 6                                 | Yes                     |                                 |                    |
| 50     | NIST Cd | 60              | Refluxed and extracted | 2.85                          | 0.62              | 0.62              | 34                                | Yes                     |                                 |                    |
| 51     | NIST Cd | 60              | Refluxed and extracted | 3.42                          | 0.60              | 0.62              | 34                                | Yes                     |                                 |                    |
| 52     | Nod-A-1 | 60              | Untreated              | 3.73                          | 0.69              | 0.66              | 6                                 | Yes                     |                                 |                    |
| 53     | Nod-A-1 | 60              | Untreated              | 1.34                          | 0.71              | 0.76              | 9                                 | Yes                     |                                 |                    |
| 54     | Nod-A-1 | 60              | Untreated              | 3.01                          | 1.57              | 0.96              | 7                                 | No                      | 87                              | Low beam intensity |
| 55     | Nod-A-1 | 120             | Untreated              | 1.70                          | 1.06              | 0.52              | 8                                 | No                      |                                 |                    |
| 56     | Nod-A-1 | 60              | Refluxed               | 6.36                          | 0.86              | 0.62              | 8                                 | Yes                     |                                 |                    |
| 57     | Nod-A-1 | 60              | Refluxed               | 2.20                          | 0.98              | 0.72              | 18                                | Yes                     |                                 |                    |
| 58     | Nod-A-1 | 120             | Refluxed               | 1.80                          | 0.83              | 0.52              | 6                                 | No                      |                                 |                    |
| 59     | Nod-A-1 | 60              | Extracted              | 1.98                          | 0.55              | 0.56              | 9                                 | Yes                     |                                 |                    |
| 60     | Nod-A-1 | 60              | Extracted              | 1.36                          | 0.62              | 0.87              | 6                                 | Yes                     |                                 |                    |
| 61     | Nod-A-1 | 60              | Extracted              | 1.51                          | 0.90              | 0.76              | 8                                 | Yes                     |                                 |                    |
| 62     | Nod-A-1 | 60              | Extracted              | 1.90                          | 0.69              | 0.70              | 28                                | Yes                     |                                 |                    |
| 63     | Nod-A-1 | 60              | Extracted and refluxed | 1.97                          | 0.70              | 1.24              | 9                                 | Yes                     |                                 |                    |
| 64     | Nod-A-1 | 60              | Extracted and refluxed | 2.37                          | 0.81              | 0.87              | 8                                 | Yes                     |                                 |                    |
| 65     | Nod-A-1 | 60              | Refluxed and extracted | 4.04                          | 1.08              | 0.72              | 6                                 | Yes                     | 58                              | Low beam intensity |
| 66     | Nod-A-1 | 60              | Refluxed and extracted | 3.16                          | 0.80              | 0.53              | 6                                 | Yes                     |                                 |                    |
| 67     | Nod-A-1 | 120             | Refluxed and extracted | 2.24                          | 0.74              | 0.52              | 8                                 | No                      |                                 |                    |

## S2 Further information on untreated Nod-A-1 analyses

Of the three samples of untreated Nod-A-1 that were analyzed, only one produced a reasonable result, of  $\epsilon^{114/110}\text{Cd} = 1.3 \pm 0.8$ , which is in good agreement with literature values (Table 2). The second sample yielded an isotopic composition that was significantly heavier than literature values ( $\epsilon^{114/110}\text{Cd} = 3.7 \pm 0.7$ ). This analysis was also compromised by a 2.2  $\epsilon$  unit drop in the data obtained for subsequent measurements of the bracketing standard, so these analyses of the standard were excluded from the calculation of the sample isotope composition. This ‘drop’ occurred between the first and second analyses of the standard solution after the Nod-A-1 sample, and was accompanied by large changes in  $f_{kin}$  (Fig. 2). The instrumental sensitivity obtained during the analysis of the third untreated Nod-A-1 sample was just 14% of the expected level. Incomplete dissolution of the Cd fraction in 0.1 M  $\text{HNO}_3$  is unlikely to be responsible for this dramatic reduction in sensitivity. A more plausible explanation is that the organic resin residue disrupted the normal behavior of the instrument and/or sample introduction system.

### S3 Modeling of spectral interferences

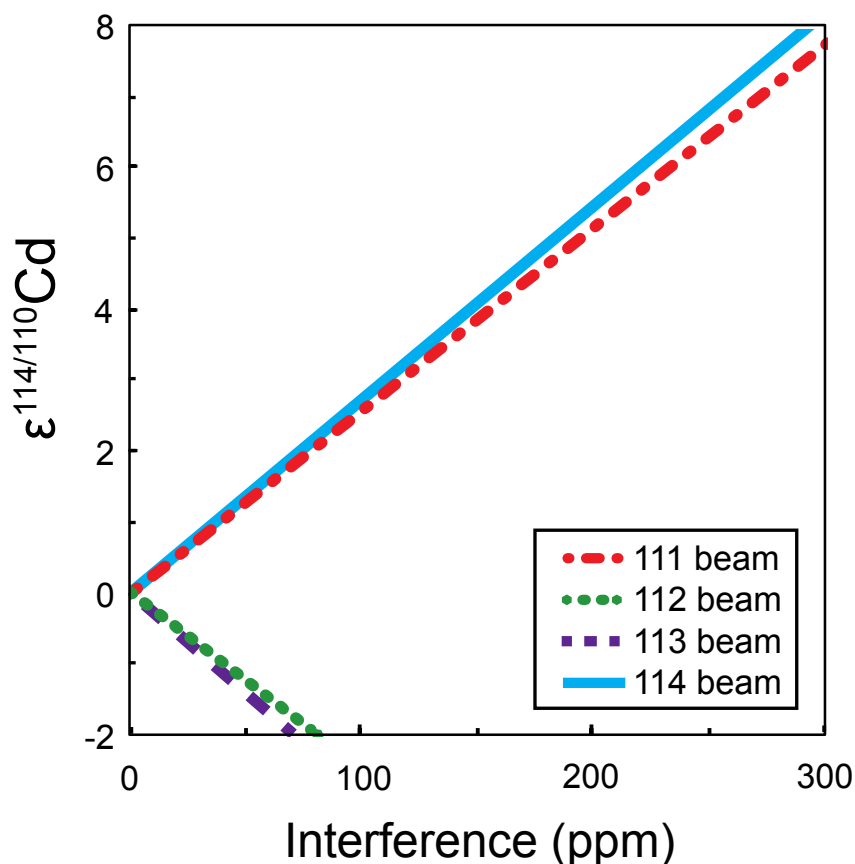

The modeling shows that it is possible that a spectral interference on one ion beam can alter the mass bias corrected  $\epsilon^{114/110}\text{Cd}$  value. These experiments were conducting using the ion beam intensity data from a single measurement of a NIST SRM 3108 Cd standard solution (with  $\epsilon^{114/110}\text{Cd} = 0$ ) that was doped with the Cd double spike (to  $S/N \approx 1$ ) to obtain a total Cd concentration of 60 ng/ml. In the modeling, the ion beam intensity data were manipulated to simulate an interference on a single ion beam. This was repeated for a range of interference magnitudes, and on each ion beam. The Cd isotope compositions were subsequently calculated using the normal double spike data reduction spreadsheet, as an offset from the original (unaltered) Cd isotope composition.

**S4 Modeling the effects of changing the mass dependence ( $n$  factor) of the General Power Law that is used for correction of the instrumental mass fractionation**

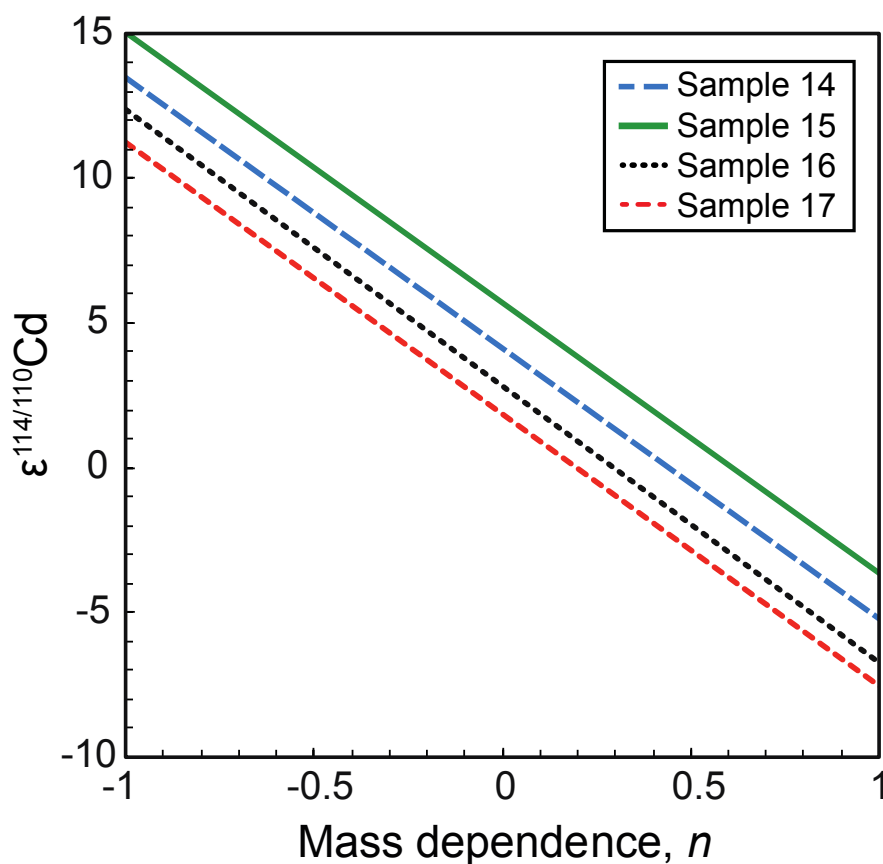

The mass bias corrected isotope composition of a sample was recalculated for values of  $n$  (which describes the mass dependence of the instrumental mass fractionation correction that is applied using the General Power Law) between -1 and 1 for four refluxed NIST Cd samples with 60 ng of total Cd. Using our normal value of  $n = -0.1$ , these samples yielded  $\epsilon^{114/110}\text{Cd}$  values of between +2.7 and +6.4. Notably, each sample can be corrected to the reference value of  $\epsilon^{114/110}\text{Cd} = 0$  using  $n$  values of 0.2 to 0.6. This is a reasonable range of values as they are intermediate between the kinetic/exponential and power laws. Sample numbers refer to the data presented in the Table of S1.
